# Supplementary material for: Synthesis of three crystalline forms of Al2O3 featuring rod-like fibers and their effect on the gaseous degradation of 1-chloronaphthalene
Source: Royal Society of Chemistry journal article supplement (doi:10.1039/c6en00662k), 2017-01-01
Supplement: c6en00662k1.pdf [file c6en00662k1.pdf]

1 **Synthesis of three crystalline forms of the Al<sub>2</sub>O<sub>3</sub> featuring rod-like fibers and their effect**  
2 **to gas degradation of 1-chloronaphthalene**

3 Huijie Lu,<sup>abc</sup> Qianqian Li,<sup>ab</sup> Guijin Su,<sup>\*ab</sup> Minghui Zheng,<sup>ab</sup> Yuyang Zhao,<sup>ab</sup> Xue Miao,<sup>ab</sup> Yalu  
4 Liu,<sup>ab</sup> Xinchun Huang<sup>ab</sup> and Yanhui Zhao<sup>ab</sup>

5 <sup>a</sup>State Key Laboratory of Environmental Chemistry and Ecotoxicology, Research Center for  
6 Eco-Environmental Sciences, Chinese Academy of Sciences, P.O. Box 2871, Beijing 100085,  
7 China;

8 <sup>b</sup>University of Chinese Academy of Sciences, Beijing 100049, China;

9 <sup>c</sup>Beijing Environmental Sanitation Engineering Research Institute, Jia no. 48 Shangjialou,  
10 Chaoyang District, Beijing 100028, China

11 \*Corresponding author: Dr. Guijin Su; Tel: +86 10 62849356; Fax: + 86 10 62923563; E-mail  
12 address: [gjsu@rcees.ac.cn](mailto:gjsu@rcees.ac.cn) (G. Su).

13 **List of Supporting Information Contents:**

14 ➤ **Fig. S1** Schematic of the pulsed flow microreactor used in the present study.

15 ➤ **Table S1** The mass-to-charge ratios ( $m/z$ ) of PCNs.

16 ➤ **Table S2** Physical properties of the prepared  $\text{Al}_2\text{O}_3$  materials.

17 ➤ **Table S3** Acid site assignments of the IR bands ( $\text{cm}^{-1}$ ) observed upon adsorption of  $\text{NH}_3$

18 on the three crystalline  $\text{Al}_2\text{O}_3$  samples.

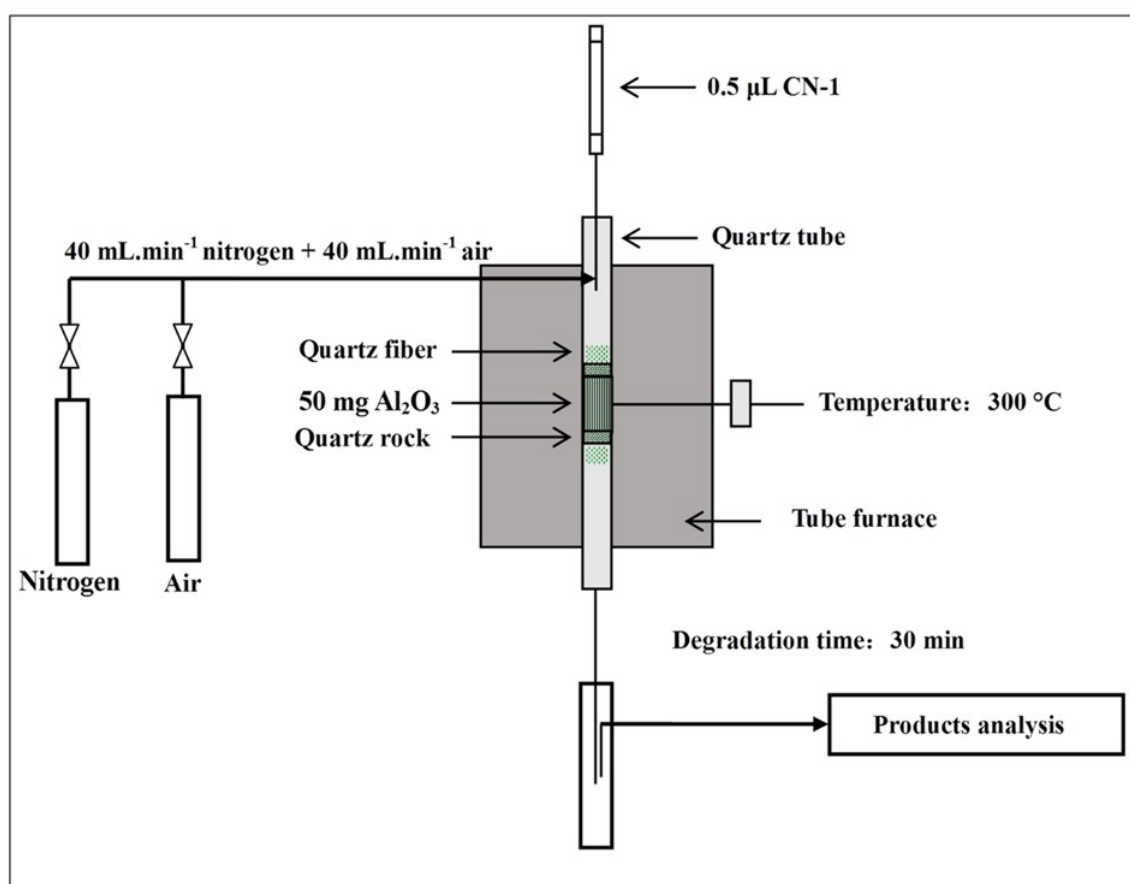

19

20

21 **Fig. S1** Schematic of the pulsed flow microreactor used in the present study.

22

| PCN Congeners | m/z | Type of m/z                     |
|---------------|-----|---------------------------------|
| Naphthalene   | 128 | M                               |
|               | 102 | M-C <sub>2</sub> H <sub>2</sub> |
| MoCN          | 162 | M                               |
|               | 164 | M+2                             |
| DiCN          | 196 | M                               |
|               | 198 | M+2                             |

23 **Table S1** The mass-to-charge ratios (m/z) of PCNs.

24

| Materials                                | $S_{\text{BET}}$    | Total pore volume    | Average pore diameter | $O_{\alpha}$ (%) |
|------------------------------------------|---------------------|----------------------|-----------------------|------------------|
|                                          | (m <sup>2</sup> /g) | (cm <sup>3</sup> /g) | (nm)                  |                  |
| $\alpha$ -Al <sub>2</sub> O <sub>3</sub> | 5.2                 | 0.025                | 3.39                  | 14.0             |
| $\eta$ -Al <sub>2</sub> O <sub>3</sub>   | 34.9                | 0.063                | 3.84                  | 10.5             |
| $\gamma$ -Al <sub>2</sub> O <sub>3</sub> | 135.0               | 0.199                | 3.83                  | 31.3             |

25 **Table S2** Physical properties of the prepared Al<sub>2</sub>O<sub>3</sub> materials.

26

| Al <sub>2</sub> O <sub>3</sub><br>samples | Vibrational feature (cm <sup>-1</sup> ) |      |      |      |                     |      |      |
|-------------------------------------------|-----------------------------------------|------|------|------|---------------------|------|------|
|                                           | Lewis acid sites                        |      |      |      | Brønsted acid sites |      |      |
| $\alpha$ -Al <sub>2</sub> O <sub>3</sub>  |                                         | 1587 |      |      |                     |      |      |
| $\eta$ -Al <sub>2</sub> O <sub>3</sub>    | 1625                                    | 1587 | 1255 | 1172 | 1480                | 1453 |      |
| $\gamma$ -Al <sub>2</sub> O <sub>3</sub>  | 1625                                    | 1587 | 1255 | 1172 | 1682                | 1480 | 1453 |

27 **Table S3** Acid site assignments of the IR bands (cm<sup>-1</sup>) observed upon adsorption of NH<sub>3</sub> on

28 the three crystalline Al<sub>2</sub>O<sub>3</sub> samples.
